# Supplementary material
Source: ML conference proceedings conference paper supplement (https://proceedings.neurips.cc/paper_files/paper/2023/hash/62d2cec62b7fd46dd35fa8f2d4aeb52d-Abstract.html)
Supplement: Supplementary file 1 [file 62d2cec62b7fd46dd35fa8f2d4aeb52d-Supplemental-Datasets_and_Benchmarks.pdf]

354 **A Additional Benchmark Information**

355 **A.1 Offline**

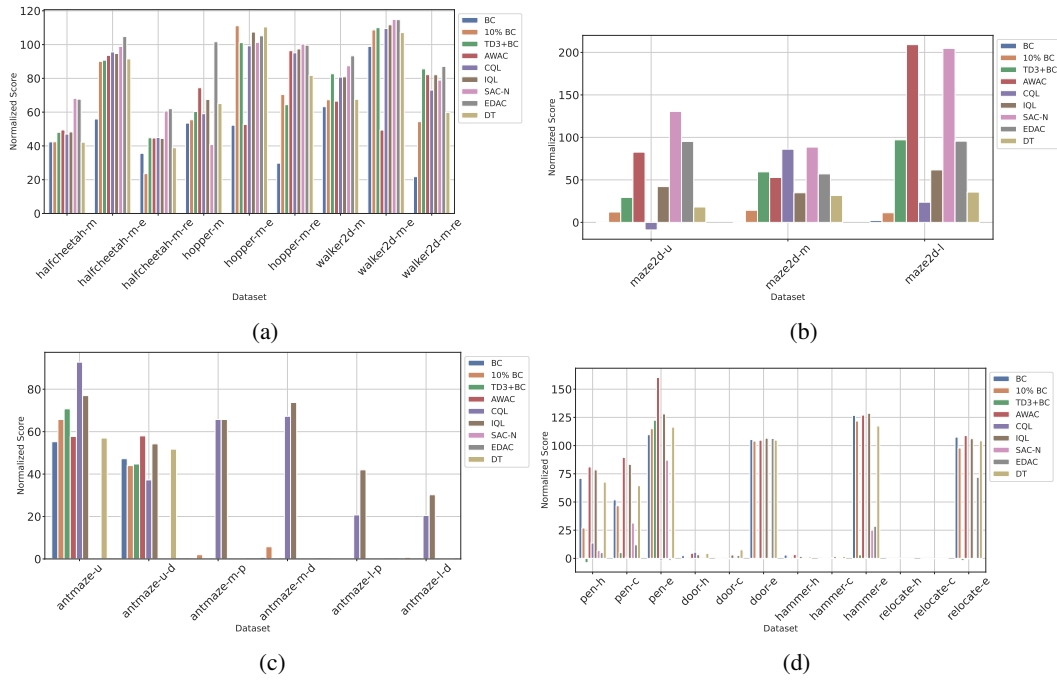

Figure 4: Graphical representation of the normalized performance of the last trained policy on D4RL averaged over 4 random seeds. (a) Gym-MuJoCo datasets. (b) Maze2d datasets (c) AntMaze datasets (d) Adroit datasets

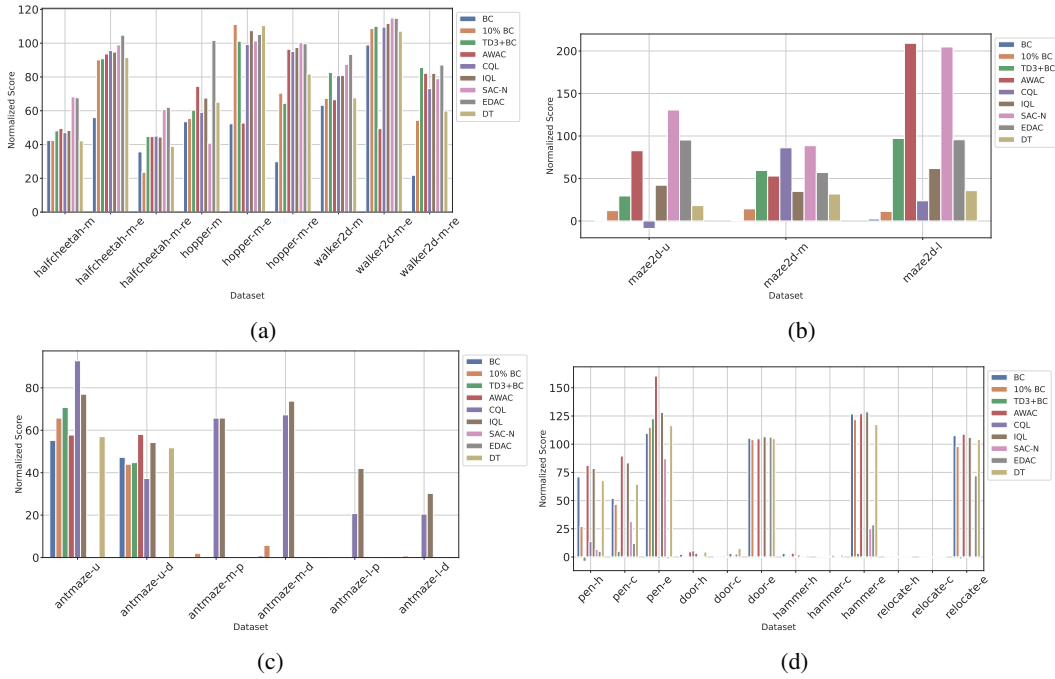

Figure 5: Graphical representation of the normalized performance of the best trained policy on D4RL averaged over 4 random seeds. (a) Gym-MuJoCo datasets. (b) Maze2d datasets (c) AntMaze datasets (d) Adroit datasets

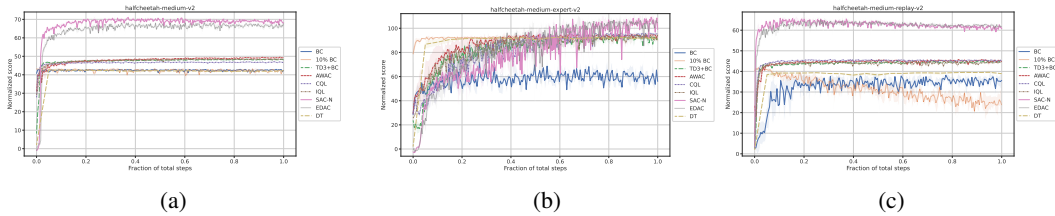

Figure 6: Training curves for HalfCheetah task. (a) Medium dataset, (b) Medium-expert dataset, (c) Medium-replay dataset

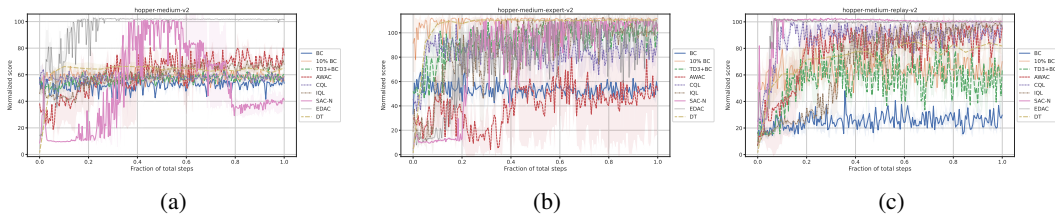

Figure 7: Training curves for Hopper task. (a) Medium dataset, (b) Medium-expert dataset, (c) Medium-replay dataset

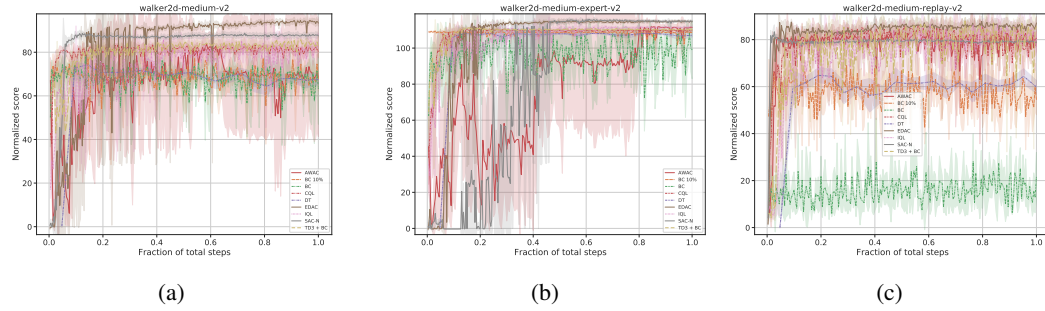

Figure 8: Training curves for Walker2d task.  
 (a) Medium dataset, (b) Medium-expert dataset, (c) Medium-replay dataset

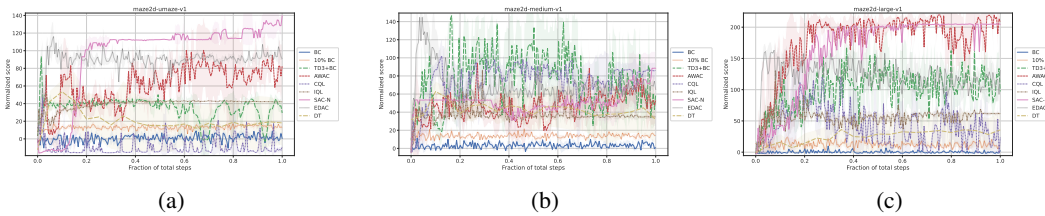

Figure 9: Training curves for Maze2d task.  
 (a) Medium dataset, (b) Medium-expert dataset, (c) Medium-replay dataset

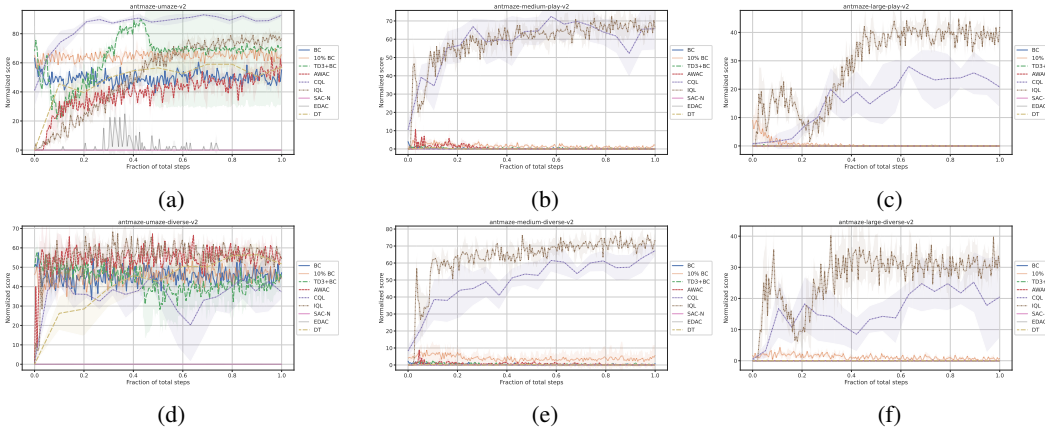

Figure 10: Training curves for AntMaze task.  
 (a) Umaze dataset, (b) Medium-play dataset, (c) Large-play dataset, (d) Umaze-diverse dataset, (e) Medium-diverse dataset, (f) Large-diverse dataset

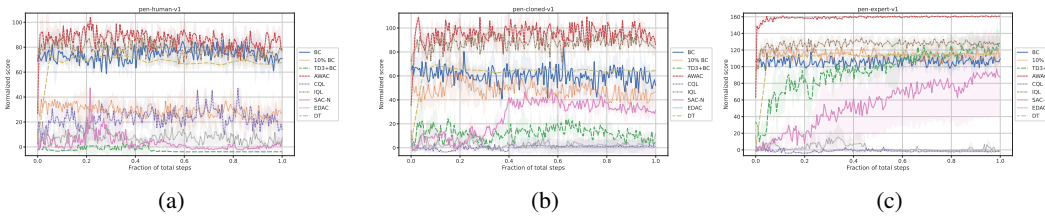

Figure 11: Training curves for Pen task.  
 (a) Human dataset, (b) Colned dataset, (c) Expert dataset

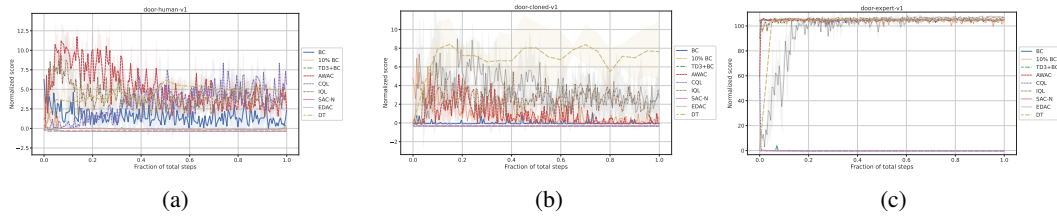

Figure 12: Training curves for Door task.  
 (a) Human dataset, (b) Colned dataset, (c) Expert dataset

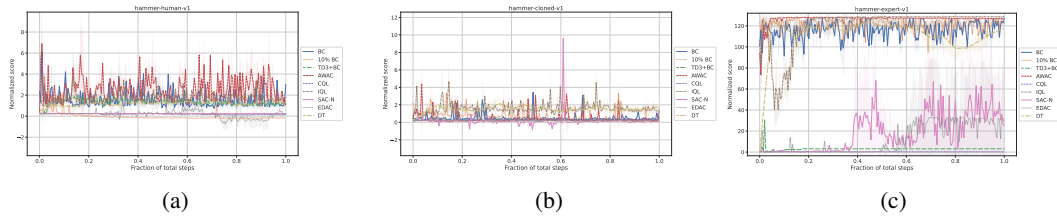

Figure 13: Training curves for Hammer task.  
 (a) Human dataset, (b) Colned dataset, (c) Expert dataset

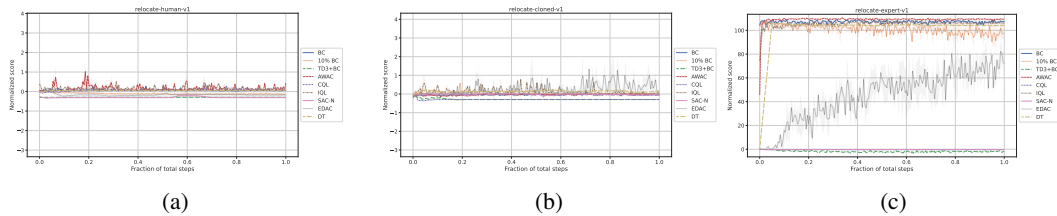

Figure 14: Training curves for Relocate task.  
 (a) Human dataset, (b) Colned dataset, (c) Expert dataset

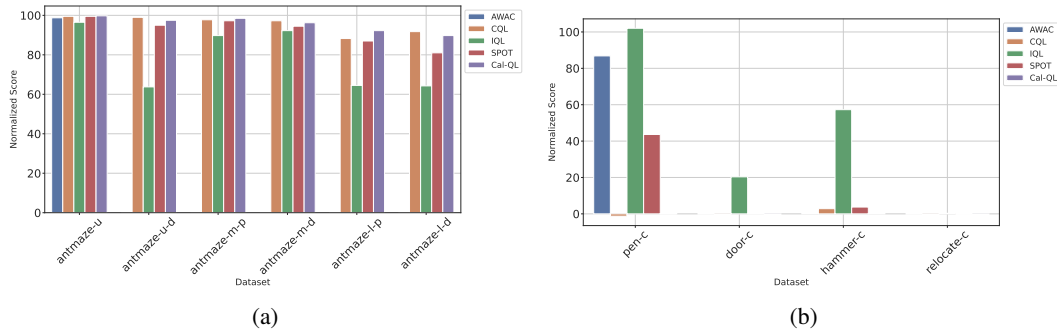

Figure 15: Graphical representation of the normalized performance of the last trained policy on D4RL after online tuning averaged over 4 random seeds. (a) AntMaze datasets (b) Adroit datasets

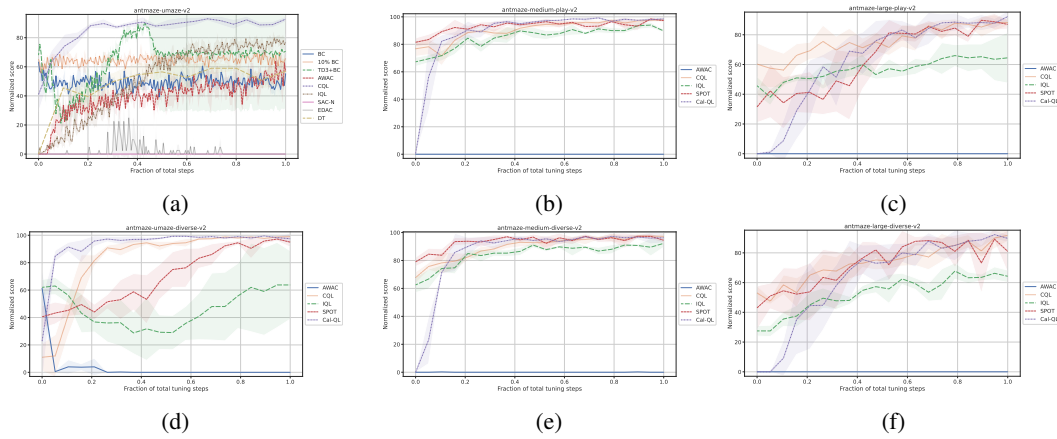

Figure 16: Training curves for AntMaze task during online tuning. (a) Umaze dataset, (b) Medium-play dataset, (c) Large-play dataset, (d) Umaze-diverse dataset, (e) Medium-diverse dataset, (f) Large-diverse dataset

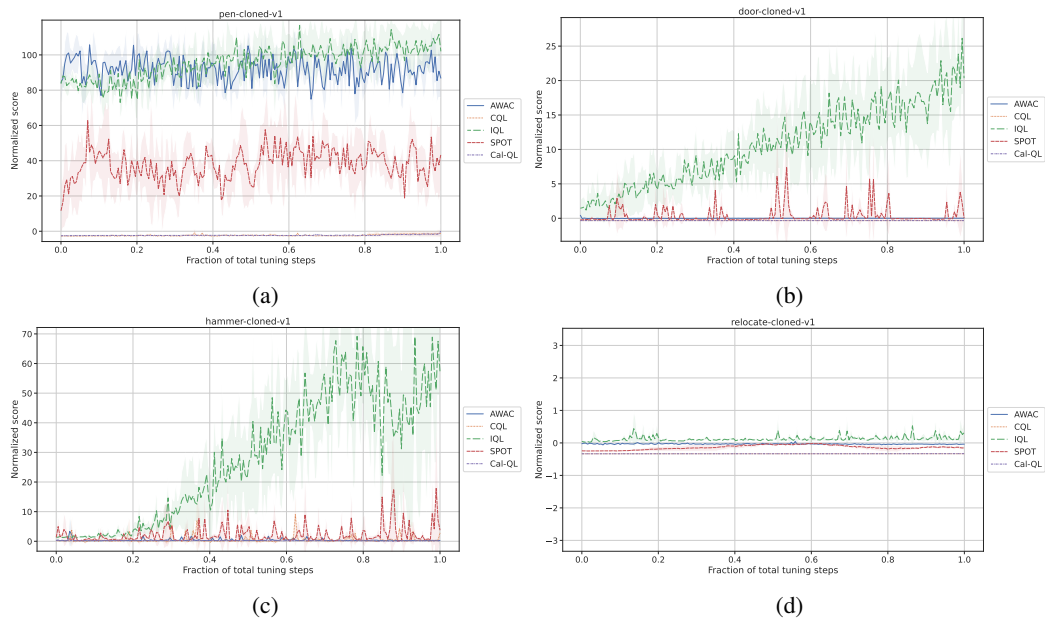

Figure 17: Training curves for Adroit Cloned task during online tuning.  
 (a) Pen, (b) Door, (c) Hammer, (d) Relocate

357 **B Weights&Biases Tracking**

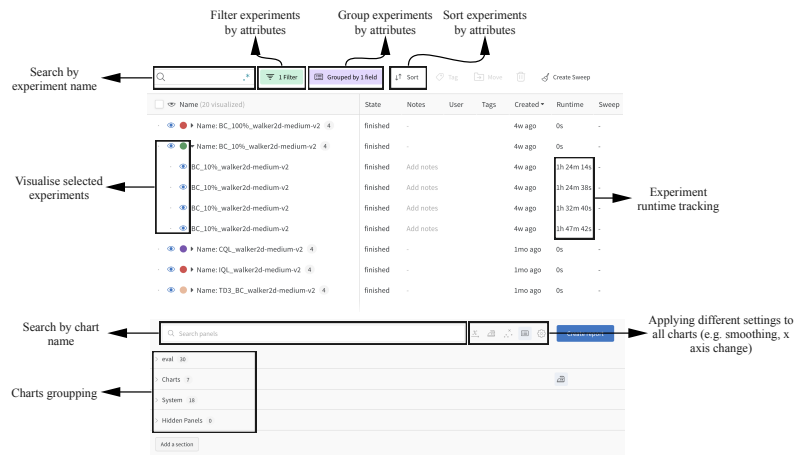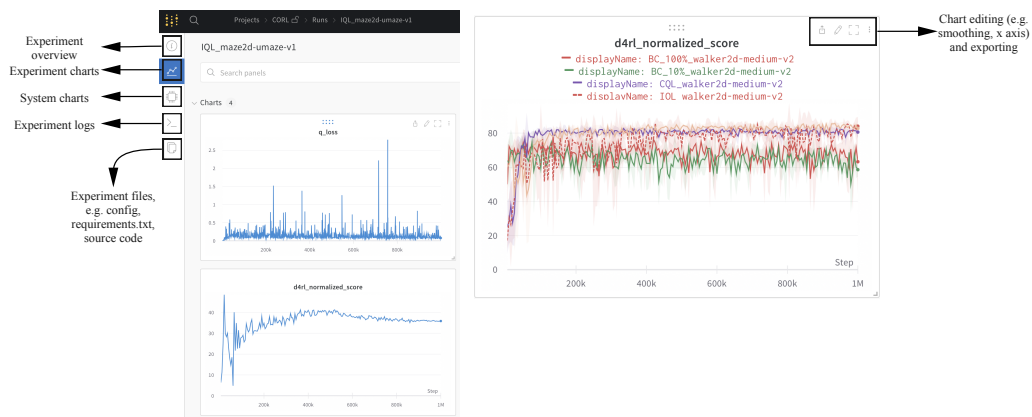

Figure 18: Screenshots of Weights&Biases experiment tracking interface.

358 **C License**

359 Our codebase is released under Apache License 2.0. The D4RL datasets (Fu et al., 2020) are released  
 360 under Apache License 2.0.

## 361 D Experimental Details

362 We modify reward on AntMaze task by subtracting 1 from reward as it is done in previous works  
363 except CQL and Cal-QL, where (0, 1) are mapped into (-5, 5).

364 We used original implementation of TD3 + BC<sup>14</sup>, SAC-*N*/EDAC<sup>15</sup>, SPOT<sup>16</sup> and custom implementa-  
365 tions of IQL<sup>17</sup> and CQL/Cal-QL<sup>18</sup> as the basis for ours.

366 For most of the algorithms and datasets, we use default hyperparameters if available. Configuration  
367 files for every algorithm and environment are presented in our GitHub repository. Hyperparameters  
368 are also provided in subsection D.2.

369 All the experiments ran using V100 and A100 GPUs, which took approximately 5000 hours of  
370 compute in total.

### 371 D.1 Number of update steps and evaluation rate

372 Following original work, SAC-*N* and EDAC are trained for 3 million steps (except AntMaze, which  
373 is trained for 1 million steps) in order to obtain state-of-the-art performance and tested every 10000  
374 steps. Decision Transformer (DT) training is splitted into datasets pass epochs. We train DT for 50  
375 epochs on each dataset and evaluate every 5 epochs. All other algorithms are trained for 1 million  
376 steps and evaluated every 5000 steps (50000 for AntMaze). We evaluate every policy for 10 episodes  
377 on Gym-MuJoCo and Adroit tasks and for 100 for Maze2d and AntMaze tasks.

### 378 D.2 Hyperparameters

Table 5: BC and BC-*N*% hyperparameters. † used for the best trajectories choice.

|                                | Hyperparameter                     | Value                    |
|--------------------------------|------------------------------------|--------------------------|
| BC hyperparameters             | Optimizer                          | Adam (Kingma & Ba, 2014) |
|                                | Learning Rate                      | 3e-4                     |
|                                | Mini-batch size                    | 256                      |
| Architecture                   | Policy hidden dim                  | 256                      |
|                                | Policy hidden layers               | 2                        |
|                                | Policy activation function         | ReLU                     |
| BC- <i>N</i> % hyperparameters | Ratio of best trajectories used    | 0.1                      |
|                                | Discount factor <sup>†</sup>       | 1.0                      |
|                                | Max trajectory length <sup>†</sup> | 1000                     |

<sup>14</sup>[https://github.com/sfujim/TD3\\_BC](https://github.com/sfujim/TD3_BC)

<sup>15</sup><https://github.com/snu-mlab/EDAC>

<sup>16</sup><https://github.com/thuml/SPOT>

<sup>17</sup><https://github.com/gwthomas/IQL-PyTorch>

<sup>18</sup><https://github.com/young-geng/CQL>



Table 6: TD3+BC hyperparameters.

|                        | Hyperparameter             | Value                    |
|------------------------|----------------------------|--------------------------|
| TD3 hyperparameters    | Optimizer                  | Adam (Kingma & Ba, 2014) |
|                        | Critic learning rate       | 3e-4                     |
|                        | Actor learning rate        | 3e-4                     |
|                        | Mini-batch size            | 256                      |
|                        | Discount factor            | 0.99                     |
|                        | Target update rate         | 5e-3                     |
|                        | Policy noise               | 0.2                      |
|                        | Policy noise clipping      | (-0.5, 0.5)              |
|                        | Policy update frequency    | 2                        |
| Architecture           | Critic hidden dim          | 256                      |
|                        | Critic hidden layers       | 2                        |
|                        | Critic activation function | ReLU                     |
|                        | Actor hidden dim           | 256                      |
|                        | Actor hidden layers        | 2                        |
|                        | Actor activation function  | ReLU                     |
| TD3+BC hyperparameters | $\alpha$                   | 2.5                      |

Table 7: CQL and Cal-QL hyperparameters. Note: used hyperparameters are suboptimal on Adroit for the implementation we provide.

|                        | Hyperparameter                    | Value                                          |
|------------------------|-----------------------------------|------------------------------------------------|
| SAC hyperparameters    | Optimizer                         | Adam (Kingma & Ba, 2014)                       |
|                        | Critic learning rate              | 3e-4                                           |
|                        | Actor learning rate               | 1e-4                                           |
|                        | Mini-batch size                   | 256                                            |
|                        | Discount factor                   | 0.99                                           |
|                        | Target update rate                | 5e-3                                           |
|                        | Target entropy                    | -1 · Action Dim                                |
|                        | Entropy in Q target               | False                                          |
| Architecture           | Critic hidden dim                 | 256                                            |
|                        | Critic hidden layers              | 5, AntMaze<br>3, otherwise                     |
|                        | Critic activation function        | ReLU                                           |
|                        | Actor hidden dim                  | 256                                            |
|                        | Actor hidden layers               | 3                                              |
|                        | Actor activation function         | ReLU                                           |
| CQL hyperparameters    | Lagrange                          | True, Maze2d and AntMaze<br>False, otherwise   |
|                        | Offline $\alpha$                  | 1.0, Adroit<br>5.0, AntMaze<br>10.0, otherwise |
|                        | Lagrange gap                      | 5, Maze2d<br>0.8, AntMaze                      |
|                        | Pre-training steps                | 0                                              |
|                        | Num sampled actions (during eval) | 10                                             |
|                        | Num sampled actions (logsumexp)   | 10                                             |
| Cal-QL hyperparameters | Mixing ratio                      | 0.5                                            |
|                        | Online $\alpha$                   | 1.0, Adroit<br>5.0, AntMaze                    |

Table 8: IQL hyperparameters.

|                           | Hyperparameter                                              | Value                                                        |
|---------------------------|-------------------------------------------------------------|--------------------------------------------------------------|
| IQL hyperparameters       | Optimizer                                                   | Adam (Kingma & Ba, 2014)                                     |
|                           | Critic learning rate                                        | 3e-4                                                         |
|                           | Actor learning rate                                         | 3e-4                                                         |
|                           | Value learning rate                                         | 3e-4                                                         |
|                           | Mini-batch size                                             | 256                                                          |
|                           | Discount factor                                             | 0.99                                                         |
|                           | Target update rate                                          | 5e-3                                                         |
|                           | Learning rate decay                                         | Cosine                                                       |
|                           | Deterministic policy                                        | True, Hopper Medium and Medium-replay<br>False, otherwise    |
|                           | $\beta$                                                     | 6.0, Hopper Medium-expert<br>10.0, AntMaze<br>3.0, otherwise |
| $\tau$                    | 0.9, AntMaze<br>0.5, Hopper Medium-expert<br>0.7, otherwise |                                                              |
| Architecture              | Critic hidden dim                                           | 256                                                          |
|                           | Critic hidden layers                                        | 2                                                            |
|                           | Critic activation function                                  | ReLU                                                         |
|                           | Actor hidden dim                                            | 256                                                          |
|                           | Actor hidden layers                                         | 2                                                            |
|                           | Actor activation function                                   | ReLU                                                         |
|                           | Value hidden dim                                            | 256                                                          |
|                           | Value hidden layers                                         | 2                                                            |
| Value activation function | ReLU                                                        |                                                              |

Table 9: AWAC hyperparameters.

|                           | Hyperparameter             | Value                                     |
|---------------------------|----------------------------|-------------------------------------------|
| AWAC hyperparameters      | Optimizer                  | Adam (Kingma & Ba, 2014)                  |
|                           | Critic learning rate       | 3e-4                                      |
|                           | Actor learning rate        | 3e-4                                      |
|                           | Mini-batch size            | 256                                       |
|                           | Discount factor            | 0.99                                      |
|                           | Target update rate         | 5e-3                                      |
|                           | $\lambda$                  | 0.1, Maze2d, AntMaze<br>0.3333, otherwise |
| Architecture              | Critic hidden dim          | 256                                       |
|                           | Critic hidden layers       | 2                                         |
|                           | Critic activation function | ReLU                                      |
|                           | Actor hidden dim           | 256                                       |
|                           | Actor hidden layers        | 2                                         |
| Actor activation function | ReLU                       |                                           |

Table 10: SAC- $N$  and EDAC hyperparameters.

|                          | Hyperparameter             | Value                                                        |
|--------------------------|----------------------------|--------------------------------------------------------------|
| SAC hyperparameters      | Optimizer                  | Adam (Kingma & Ba, 2014)                                     |
|                          | Critic learning rate       | $3e-4$                                                       |
|                          | Actor learning rate        | $3e-4$                                                       |
|                          | $\alpha$ learning rate     | $3e-4$                                                       |
|                          | Mini-batch size            | 256                                                          |
|                          | Discount factor            | 0.99                                                         |
|                          | Target update rate         | $5e-3$                                                       |
|                          | Target entropy             | $-1 \cdot \text{Action Dim}$                                 |
| Architecture             | Critic hidden dim          | 256                                                          |
|                          | Critic hidden layers       | 3                                                            |
|                          | Critic activation function | ReLU                                                         |
|                          | Actor hidden dim           | 256                                                          |
|                          | Actor hidden layers        | 3                                                            |
|                          | Actor activation function  | ReLU                                                         |
| SAC- $N$ hyperparameters | Number of critics          | 10, HalfCheetah                                              |
|                          |                            | 20, Walker2d                                                 |
|                          |                            | 25, AntMaze                                                  |
|                          |                            | 200, Hopper Medium-expert, Medium-replay                     |
|                          |                            | 500, Hopper Medium                                           |
| EDAC hyperparameters     | Number of critics          | 10, HalfCheetah                                              |
|                          |                            | 10, Walker2d, AntMaze                                        |
|                          |                            | 50, Hopper                                                   |
|                          |                            | $\mu$ 5.0, HalfCheetah Medium-expert, Walker2d Medium-expert |
|                          |                            | 1.0, otherwise                                               |

Table 11: DT hyperparameters.

|                     | Hyperparameter            | Value                                                                                                                                                                                                                                                             |     |
|---------------------|---------------------------|-------------------------------------------------------------------------------------------------------------------------------------------------------------------------------------------------------------------------------------------------------------------|-----|
| DT hyperparameters  | Optimizer                 | AdamW (Loshchilov & Hutter, 2017)                                                                                                                                                                                                                                 |     |
|                     | Batch size                | 256, AntMaze<br>4096, otherwise                                                                                                                                                                                                                                   |     |
|                     | Return-to-go conditioning | (12000, 6000), HalfCheetah<br>(3600, 1800), Hopper<br>(5000, 2500), Walker2d<br>(160, 80), Maze2d umaze<br>(280, 140), Maze2d medium and large<br>(1, 0.5), AntMaze<br>(3100, 1550), Pen<br>(2900, 1450), Door<br>(12800, 6400), Hammer<br>(4300, 2150), Relocate |     |
|                     | Reward scale              | 1.0, AntMaze<br>0.001, otherwise                                                                                                                                                                                                                                  |     |
|                     | Dropout                   | 0.1                                                                                                                                                                                                                                                               |     |
|                     | Learning rate             | 0.0008                                                                                                                                                                                                                                                            |     |
|                     | Adam betas                | (0.9, 0.999)                                                                                                                                                                                                                                                      |     |
|                     | Clip grad norm            | 0.25                                                                                                                                                                                                                                                              |     |
|                     | Weight decay              | 0.0003                                                                                                                                                                                                                                                            |     |
|                     | Total gradient steps      | 100000                                                                                                                                                                                                                                                            |     |
|                     | Linear warmup steps       | 10000                                                                                                                                                                                                                                                             |     |
|                     | Architecture              | Number of layers                                                                                                                                                                                                                                                  | 3   |
|                     |                           | Number of attention heads                                                                                                                                                                                                                                         | 1   |
|                     |                           | Embedding dimension                                                                                                                                                                                                                                               | 128 |
| Activation function |                           | GELU                                                                                                                                                                                                                                                              |     |

Table 12: SPOT hyperparameters.

|                            | Hyperparameter          | Value                                                 |
|----------------------------|-------------------------|-------------------------------------------------------|
| VAE hyperparameters        | Optimizer               | Adam (Kingma & Ba, 2014)                              |
|                            | Learning rate           | 1e-3                                                  |
|                            | Mini-batch size         | 256                                                   |
|                            | Number of iterations    | $10^5$                                                |
|                            | KL term weight          | 0.5                                                   |
|                            | Encoder hidden dim      | 750                                                   |
| VAE architecture           | Encoder layers          | 3                                                     |
|                            | Latent dim              | $2 \times \text{action dim}$                          |
|                            | Decoder hidden dim      | 750                                                   |
|                            | Decoder layers          | 3                                                     |
| TD3 hyperparameters        | Optimizer               | Adam (Kingma & Ba, 2014)                              |
|                            | Critic learning rate    | 3e-4                                                  |
|                            | Actor learning rate     | 1e-4                                                  |
|                            | Mini-batch size         | 256                                                   |
|                            | Discount factor         | 0.99                                                  |
|                            | Target update rate      | 5e-3                                                  |
|                            | Policy noise            | 0.2                                                   |
|                            | Policy noise clipping   | (-0.5, 0.5)                                           |
|                            | Policy update frequency | 2                                                     |
|                            | Architecture            | Critic hidden dim                                     |
| Critic hidden layers       |                         | 2                                                     |
| Critic activation function |                         | ReLU                                                  |
| Actor hidden dim           |                         | 256                                                   |
| Actor hidden layers        |                         | 2                                                     |
| Actor activation function  |                         | ReLU                                                  |
| SPOT hyperparameters       | $\lambda$               | 0.05, 0.1, 0.2, 0.5, 1.0, 2.0, AntMaze<br>1.0, Adroit |
